# Supplementary material
Source: Research Square preprint supplement (doi:10.21203/rs.3.rs-8706540/v1)
Supplement: Supplementary file 1 [file d130e0bc80c88d72148695a2.docx]

Appendix C
Interview Guide

**A Qualitative Study Exploring Moral Distress Among Critical Care Nurses in a Low-Resource Healthcare Settings: Causes, Psychological Impact, and Coping Strategies

Core Interview Questions (30–40 minutes)**

1. **What is your understanding of moral distress?**

**Probing**

- Can you describe a situation where you experienced moral distress in your workplace?
- What specific factors contributed to your feelings of moral distress in that situation?
- How frequently do you encounter ethical dilemmas or morally distressing situations in your practice?
- How do institutional policies, hierarchies, or resource constraints affect your ability to make ethical decisions?

1. **How does moral distress impact you psychologically?**

**Probing**

- How do morally distressing situations impact your emotions, mental well-being, and job performance?
- Have you experienced symptoms of stress, anxiety, or burnout due to moral distress? If yes, can you describe them?
- How does moral distress affect your interactions with colleagues, patients, and their families?
- Have you ever considered leaving your job due to moral distress? If so, why?

1. **How do you cope with moral distress?**

**Probing**

- What strategies do you use to cope with moral distress in your work environment?
- Have you sought support from colleagues, supervisors, or institutional programs? How effective was it?
- What role do team discussions, debriefing sessions, or peer support play in helping you manage distress?
- Do you think additional training or institutional support could help reduce moral distress? If so, what would you suggest?

1. **What institutional or policy-level interventions could help reduce moral distress?**

**Probing**

- What kind of policies or workplace changes do you think would help in reducing moral distress?
- Have you ever raised concerns about ethical challenges at work? If yes, what was the response?
- What recommendations would you give to hospital administrators or policymakers to address moral distress among nurses?

**Closing (5–10 minutes)**

1. **Do you have any final thoughts or suggestions?**

**Probing**

- Is there anything else you would like to share about your experience with moral distress?
- Do you have any final thoughts on how to support nurses dealing with ethical dilemmas?
